# Supplementary material for: Putative Biomarkers of Environmental Enteric Disease Fail to Correlate in a Cross-Sectional Study in Two Study Sites in Sub-Saharan Africa
Source: MDPI journal article supplement (doi:10.3390/nu14163312), 2022-08-12
Supplement: s1 [file s1]

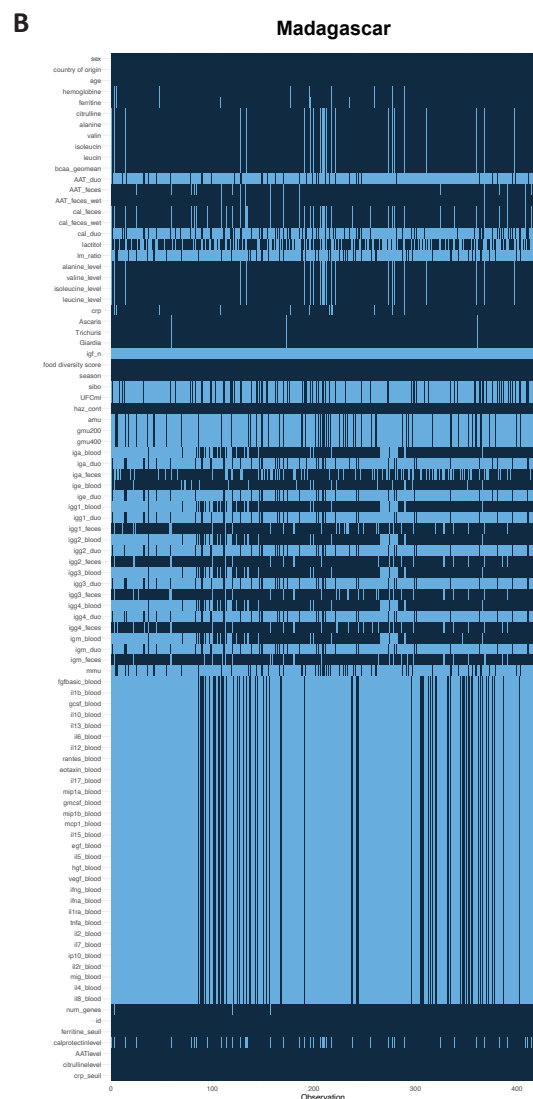

**Figure S1: Summary of available data.** Available data is indicated in black, missing/non-evaluated data in blue.

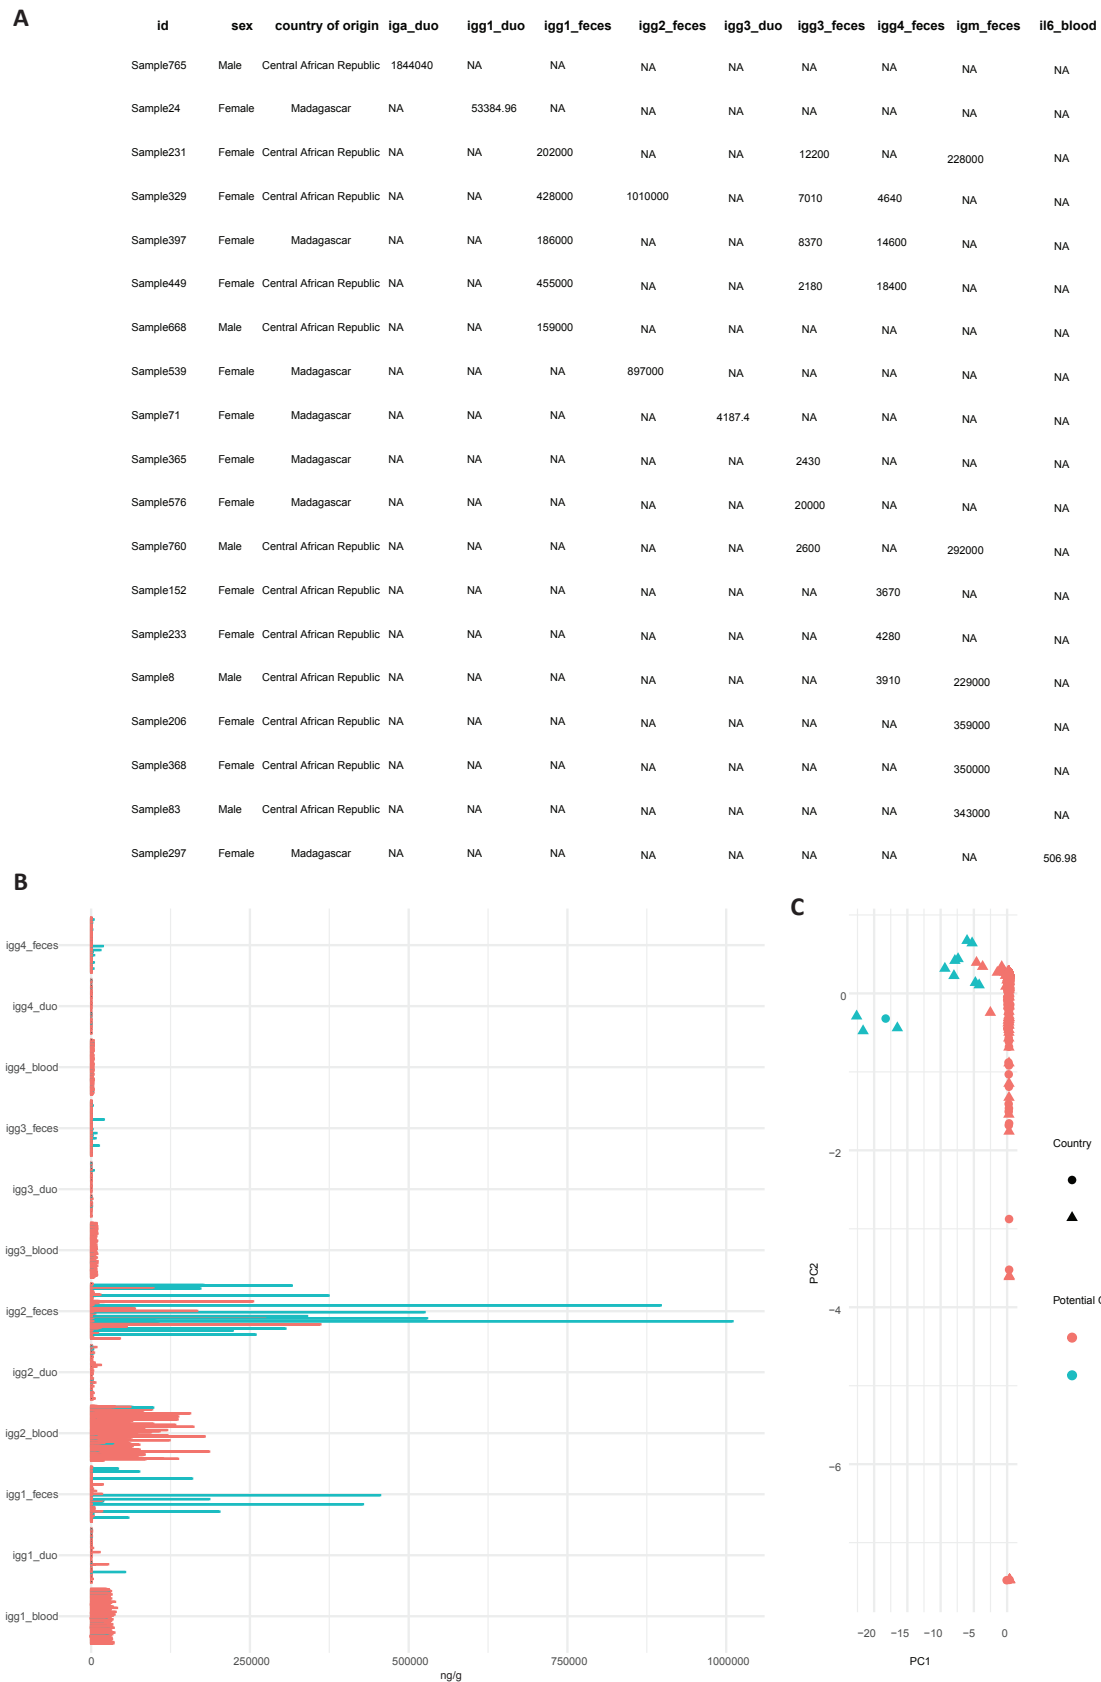

**Figure S2: Summary of potential outliers.** (a) Summary table of the samples with potential outlier values. (b) Bar plot of immunoglobulin levels and (c) PCA of immunoglobulin and cytokine levels of all samples. Potential outlier values are indicated in blue.

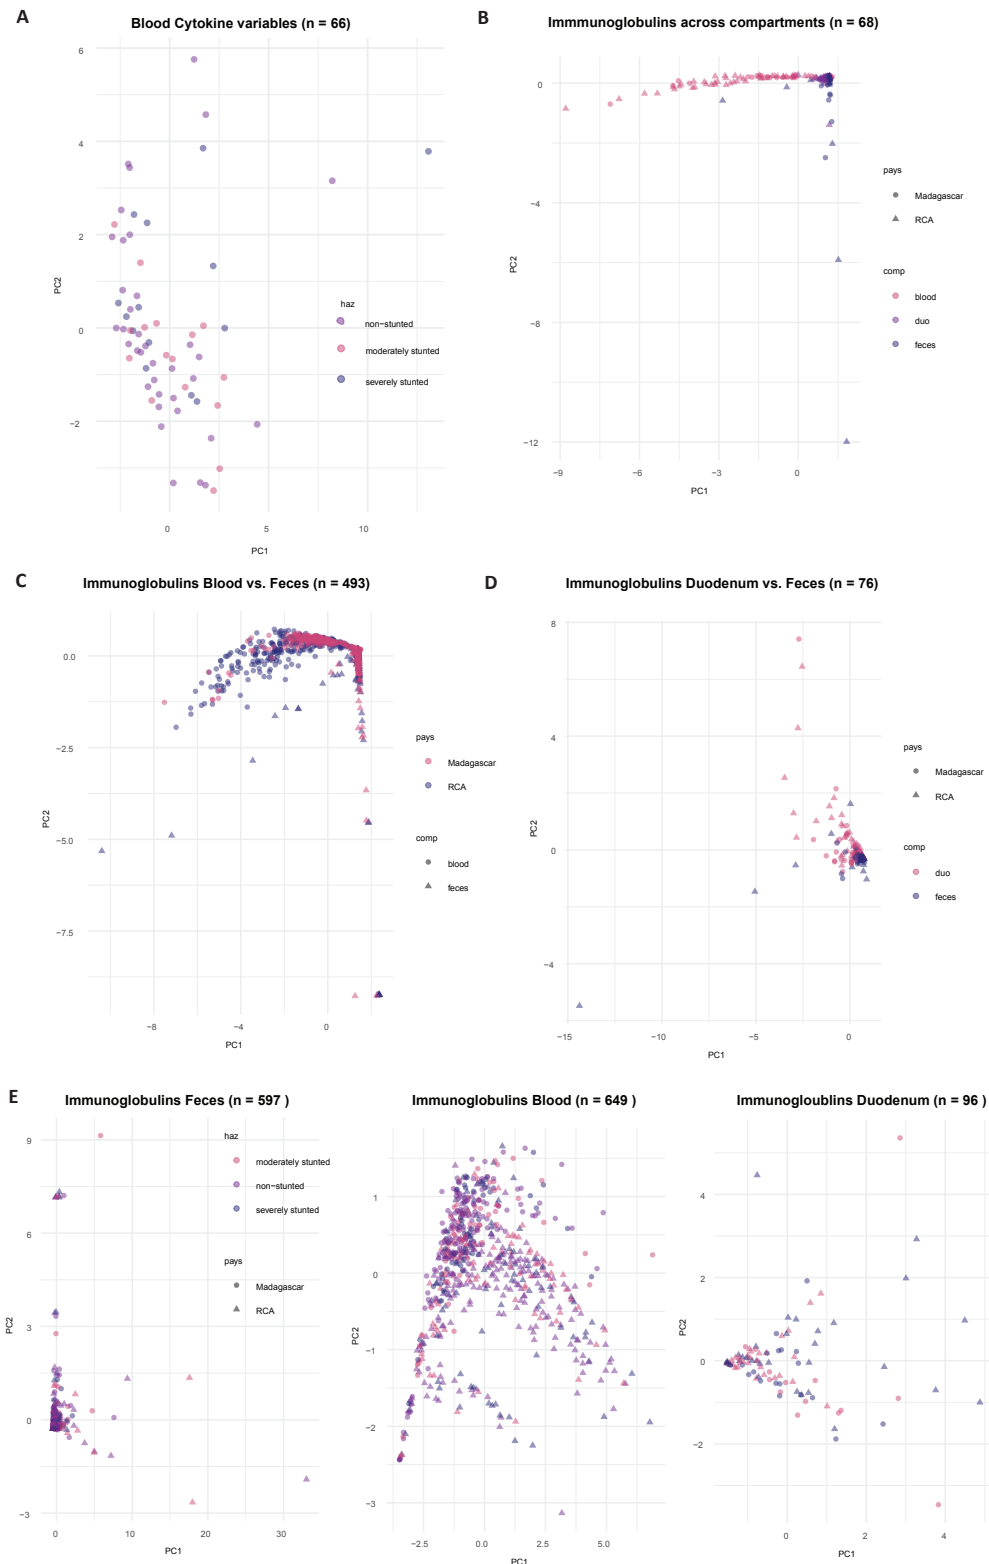

**Figure S3: Immunoglobulin and Cytokine values according to nutritional status and body compartment.** (a) PCA of blood cytokine variables according to nutritional status. (b) PCA comparing immunoglobulin profiles across compartments; PCA comparing immunoglobulin profiles between (c) blood and feces and (d) feces and duodenum (e) PCA comparing immunoglobulin profiles according to stunting status and country of origin.

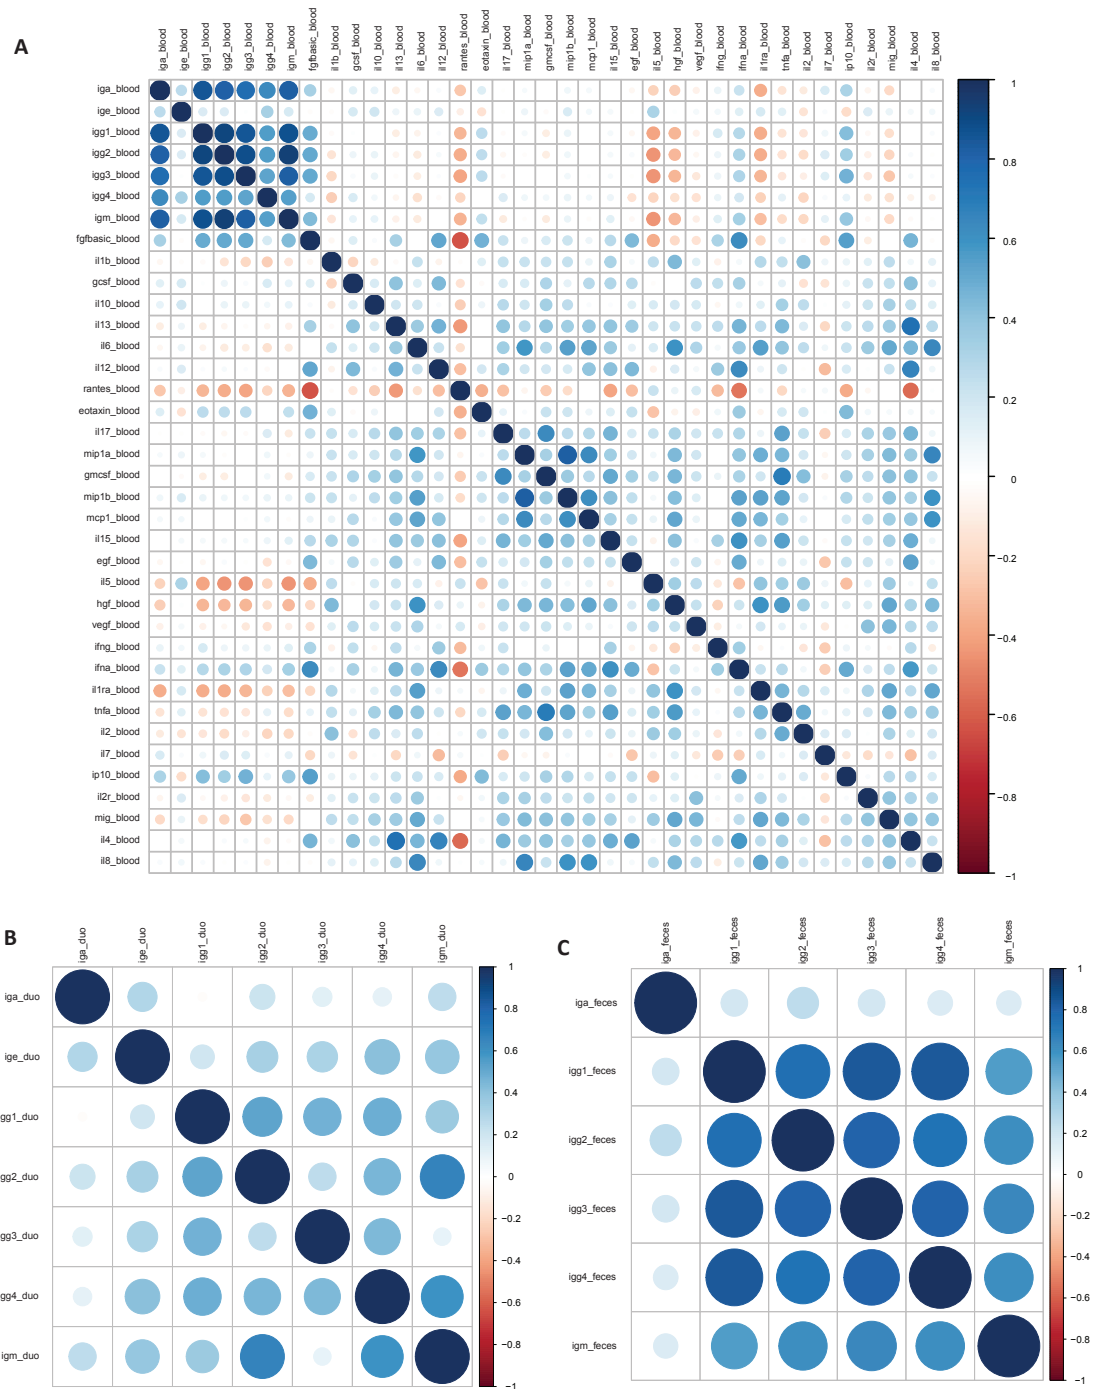

**Figure S4: Correlations between immune markers.** Correlation in between immunoglobulins and cytokines in (a) the blood and immunoglobulin levels in (b) duodenum and (c) feces. Correlation coefficient is indicated with a color code, the strength of correlation by symbol size.

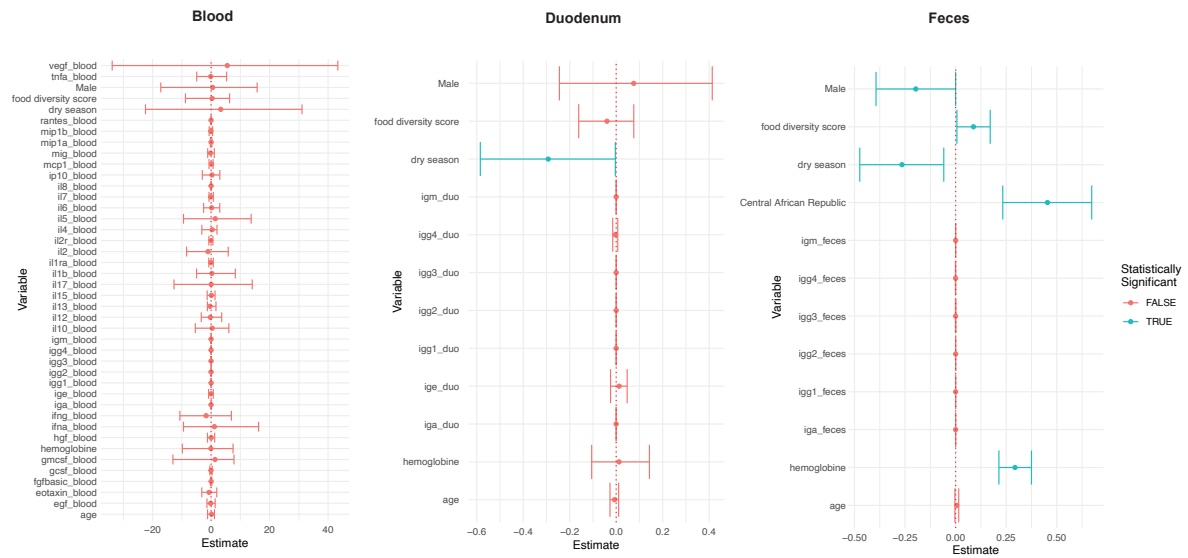

**Figure S5: Association of cytokines and/or immunoglobulins with stunted child growth.** Regression models per biomarker, taking into account associations with other biomarkers as well as potential confounding factors. The models were run on each compartment separately. Significant associations ( $p < 0.05$ ) are indicated in blue.

## Supplementary Tables

Table S1: Summary of the immunoglobulin levels across body sites and country

|                   | Madagascar             |                       | RCA                    |                       |
|-------------------|------------------------|-----------------------|------------------------|-----------------------|
|                   | non-stunted<br>(N=215) | stunted<br>(N=202)    | non-stunted<br>(N=216) | stunted<br>(N=171)    |
| <b>iga_feces</b>  |                        |                       |                        |                       |
| Mean (SD)         | 209000 (655000)        | 227000 (829000)       | 239000 (927000)        | 260000 (1070000)      |
| Median [Min, Max] | 26600 [4.62, 7000000]  | 26500 [1.00, 7000000] | 15500 [0.610, 7000000] | 16500 [1.82, 7000000] |
| Missing           | 47 (21.9%)             | 42 (20.8%)            | 29 (13.4%)             | 31 (18.1%)            |
| <b>ige_blood</b>  |                        |                       |                        |                       |
| Mean (SD)         | 5.72 (7.47)            | 9.32 (13.3)           | 3.86 (5.72)            | 4.70 (6.60)           |
| Median [Min, Max] | 2.67 [-0.996, 42.3]    | 4.11 [-0.484, 79.8]   | 1.76 [-0.762, 36.1]    | 2.09 [-0.681, 32.5]   |
| Missing           | 14 (6.5%)              | 8 (4.0%)              | 13 (6.0%)              | 8 (4.7%)              |
| <b>ige_duo</b>    |                        |                       |                        |                       |
| Mean (SD)         | NA (NA)                | 2.43 (6.21)           | NA (NA)                | 1.05 (2.73)           |
| Median [Min, Max] | NA [NA, NA]            | 0.305 [0.00500, 31.6] | NA [NA, NA]            | 0.150 [0.00500, 19.0] |
| Missing           | 215 (100%)             | 162 (80.2%)           | 216 (100%)             | 109 (63.7%)           |
| <b>igg1_blood</b> |                        |                       |                        |                       |
| Mean (SD)         | 23100 (7920)           | 23900 (6670)          | 21300 (6130)           | 21700 (6930)          |
| Median [Min, Max] | 24600 [-783, 38500]    | 24700 [-353, 40700]   | 21900 [4190, 30800]    | 22700 [-185, 34200]   |
| Missing           | 62 (28.8%)             | 64 (31.7%)            | 6 (2.8%)               | 4 (2.3%)              |
| <b>igg1_duo</b>   |                        |                       |                        |                       |
| Mean (SD)         | NA (NA)                | 1730 (8330)           | NA (NA)                | 840 (3430)            |
| Median [Min, Max] | NA [NA, NA]            | 147 [0.0400, 53400]   | NA [NA, NA]            | 151 [0.0200, 26700]   |
| Missing           | 215 (100%)             | 161 (79.7%)           | 216 (100%)             | 97 (56.7%)            |
| <b>igg1_feces</b> |                        |                       |                        |                       |
| Mean (SD)         | 170 (444)              | 1290 (13600)          | 4770 (36600)           | 4170 (34900)          |
| Median [Min, Max] | 43.3 [0.120, 4000]     | 41.6 [0.130, 186000]  | 45.4 [0.0200, 455000]  | 43.5 [0.310, 428000]  |
| Missing           | 21 (9.8%)              | 14 (6.9%)             | 10 (4.6%)              | 15 (8.8%)             |
| <b>igg2_blood</b> |                        |                       |                        |                       |
| Mean (SD)         | 10300 (13900)          | 13300 (22900)         | 24500 (31300)          | 24000 (31500)         |
| Median [Min, Max] | 6170 [399, 94200]      | 6100 [1320, 140000]   | 11900 [879, 179000]    | 10500 [666, 186000]   |
| Missing           | 62 (28.8%)             | 64 (31.7%)            | 6 (2.8%)               | 4 (2.3%)              |
| <b>igg2_duo</b>   |                        |                       |                        |                       |
| Mean (SD)         | NA (NA)                | 1880 (2810)           | NA (NA)                | 1300 (1630)           |
| Median [Min, Max] | NA [NA, NA]            | 1050 [0.00500, 15400] | NA [NA, NA]            | 767 [3.51, 8280]      |
| Missing           | 215 (100%)             | 160 (79.2%)           | 216 (100%)             | 91 (53.2%)            |
| <b>igg2_feces</b> |                        |                       |                        |                       |
| Mean (SD)         | 5890 (63900)           | 2430 (24400)          | 12000 (57900)          | 22300 (104000)        |
| Median [Min, Max] | 262 [2.09, 897000]     | 233 [5.24, 340000]    | 233 [2.40, 525000]     | 171 [2.46, 1010000]   |
| Missing           | 16 (7.4%)              | 8 (4.0%)              | 9 (4.2%)               | 14 (8.2%)             |
| <b>igg3_blood</b> |                        |                       |                        |                       |
| Mean (SD)         | 2550 (1630)            | 2850 (1810)           | 3940 (2540)            | 4060 (2410)           |
| Median [Min, Max] | 2300 [-123, 7500]      | 2430 [-94.7, 8500]    | 3520 [164, 10100]      | 3890 [-50.9, 9740]    |
| Missing           | 62 (28.8%)             | 64 (31.7%)            | 6 (2.8%)               | 4 (2.3%)              |
| <b>igg3_duo</b>   |                        |                       |                        |                       |
| Mean (SD)         | NA (NA)                | 242 (726)             | NA (NA)                | 118 (204)             |
| Median [Min, Max] | NA [NA, NA]            | 5.73 [0.0200, 4190]   | NA [NA, NA]            | 39.7 [0.00500, 1340]  |
| Missing           | 215 (100%)             | 159 (78.7%)           | 216 (100%)             | 98 (57.3%)            |
| <b>igg3_feces</b> |                        |                       |                        |                       |
| Mean (SD)         | 25.9 (183)             | 156 (1560)            | 95.6 (880)             | 65.1 (563)            |
| Median [Min, Max] | 1.41 [0.0200, 2430]    | 1.50 [0.0100, 20000]  | 1.23 [0.0200, 12200]   | 1.20 [0.0300, 7010]   |
| Missing           | 22 (10.2%)             | 9 (4.5%)              | 9 (4.2%)               | 14 (8.2%)             |
| <b>igg4_blood</b> |                        |                       |                        |                       |
| Mean (SD)         | 707 (768)              | 885 (860)             | 1430 (1200)            | 1340 (1170)           |
| Median [Min, Max] | 457 [-80.5, 3560]      | 675 [-73.7, 3670]     | 1170 [2.59, 4020]      | 1200 [-30.6, 4010]    |
| Missing           | 62 (28.8%)             | 64 (31.7%)            | 8 (3.7%)               | 4 (2.3%)              |
| <b>igg4_duo</b>   |                        |                       |                        |                       |
| Mean (SD)         | NA (NA)                | 20.8 (19.0)           | NA (NA)                | 23.1 (29.8)           |
| Median [Min, Max] | NA [NA, NA]            | 15.0 [0.00500, 74.5]  | NA [NA, NA]            | 14.1 [0.00500, 144]   |
| Missing           | 215 (100%)             | 161 (79.7%)           | 216 (100%)             | 101 (59.1%)           |
| <b>igg4_feces</b> |                        |                       |                        |                       |
| Mean (SD)         | 6.93 (13.7)            | 85.8 (1060)           | 134 (1300)             | 142 (686)             |
| Median [Min, Max] | 1.46 [0, 78.4]         | 1.74 [0.0100, 14600]  | 1.57 [0.0200, 18400]   | 1.25 [0.0200, 4640]   |
| Missing           | 19 (8.8%)              | 14 (6.9%)             | 10 (4.6%)              | 14 (8.2%)             |
| <b>igm_blood</b>  |                        |                       |                        |                       |
| Mean (SD)         | 5480 (7220)            | 5770 (7270)           | 12000 (11200)          | 10900 (10400)         |
| Median [Min, Max] | 3450 [-954, 51500]     | 3760 [-789, 49100]    | 8090 [-538, 51400]     | 6930 [-714, 46500]    |
| Missing           | 62 (28.8%)             | 65 (32.2%)            | 6 (2.8%)               | 4 (2.3%)              |
| <b>igm_duo</b>    |                        |                       |                        |                       |
| Mean (SD)         | NA (NA)                | 1160 (1060)           | NA (NA)                | 602 (810)             |
| Median [Min, Max] | NA [NA, NA]            | 782 [0.0800, 3860]    | NA [NA, NA]            | 298 [0.0400, 3820]    |
| Missing           | 215 (100%)             | 158 (78.2%)           | 216 (100%)             | 97 (56.7%)            |
| <b>igm_feces</b>  |                        |                       |                        |                       |
| Mean (SD)         | 778 (3210)             | 984 (5710)            | 6920 (38600)           | 7730 (44000)          |
| Median [Min, Max] | 124 [0.270, 30200]     | 116 [0.150, 76900]    | 64.3 [0.700, 359000]   | 95.1 [0.750, 350000]  |
| Missing           | 21 (9.8%)              | 7 (3.5%)              | 12 (5.6%)              | 16 (9.4%)             |

Table S2: Summary of the cytokine levels in the blood of children in Madagascar

|                       | non-stunted<br>(N=431) | stunted<br>(N=373)   |                    | non-stunted<br>(N=431) | stunted<br>(N=373)   |
|-----------------------|------------------------|----------------------|--------------------|------------------------|----------------------|
| <b>fgfbasic_blood</b> |                        |                      | <b>vegfblood</b>   |                        |                      |
| Mean (SD)             | 84.0 (78.5)            | 67.8 (64.8)          | Mean (SD)          | 0.291 (0.228)          | 0.506 (0.361)        |
| Median [Min, Max]     | 59.8 [0, 244]          | 34.6 [1.83, 212]     | Median [Min, Max]  | 0.244 [0.0304, 0.989]  | 0.401 [0.0960, 1.53] |
| Missing               | 395 (91.6%)            | 343 (92.0%)          | Missing            | 395 (91.6%)            | 343 (92.0%)          |
| <b>il1b_blood</b>     |                        |                      | <b>ifng_blood</b>  |                        |                      |
| Mean (SD)             | 2.62 (2.58)            | 2.67 (1.82)          | Mean (SD)          | 4.16 (3.20)            | 3.94 (3.37)          |
| Median [Min, Max]     | 1.54 [0.0597, 12.4]    | 2.16 [0.0597, 6.10]  | Median [Min, Max]  | 3.05 [0.345, 13.4]     | 3.05 [0.919, 18.2]   |
| Missing               | 395 (91.6%)            | 343 (92.0%)          | Missing            | 395 (91.6%)            | 343 (92.0%)          |
| <b>gcsfblood</b>      |                        |                      | <b>ifna_blood</b>  |                        |                      |
| Mean (SD)             | 30.0 (30.1)            | 36.8 (37.6)          | Mean (SD)          | 2.21 (2.10)            | 2.62 (2.08)          |
| Median [Min, Max]     | 14.7 [0, 100]          | 22.2 [0, 152]        | Median [Min, Max]  | 1.86 [0.0852, 10.5]    | 1.98 [0.209, 9.74]   |
| Missing               | 395 (91.6%)            | 343 (92.0%)          | Missing            | 395 (91.6%)            | 343 (92.0%)          |
| <b>il10_blood</b>     |                        |                      | <b>il1ra_blood</b> |                        |                      |
| Mean (SD)             | 3.47 (3.37)            | 3.77 (3.90)          | Mean (SD)          | 12.3 (18.2)            | 22.1 (50.3)          |
| Median [Min, Max]     | 2.39 [0.0692, 16.9]    | 1.99 [0, 17.4]       | Median [Min, Max]  | 6.78 [0, 94.3]         | 8.19 [1.07, 272]     |
| Missing               | 395 (91.6%)            | 343 (92.0%)          | Missing            | 395 (91.6%)            | 343 (92.0%)          |
| <b>il13_blood</b>     |                        |                      | <b>tnfa_blood</b>  |                        |                      |
| Mean (SD)             | 4.57 (6.56)            | 9.37 (15.0)          | Mean (SD)          | 8.68 (23.8)            | 7.24 (18.9)          |
| Median [Min, Max]     | 2.19 [0, 30.9]         | 3.48 [0, 76.4]       | Median [Min, Max]  | 0.821 [0, 105]         | 1.61 [0.216, 97.4]   |
| Missing               | 395 (91.6%)            | 343 (92.0%)          | Missing            | 395 (91.6%)            | 343 (92.0%)          |
| <b>il6_blood</b>      |                        |                      | <b>il2_blood</b>   |                        |                      |
| Mean (SD)             | 16.8 (84.5)            | 4.27 (9.36)          | Mean (SD)          | 2.44 (2.50)            | 1.98 (2.00)          |
| Median [Min, Max]     | 0.868 [0.373, 507]     | 1.32 [0.244, 41.0]   | Median [Min, Max]  | 1.36 [0, 7.13]         | 1.20 [0.0805, 7.13]  |
| Missing               | 395 (91.6%)            | 343 (92.0%)          | Missing            | 395 (91.6%)            | 343 (92.0%)          |
| <b>il12_blood</b>     |                        |                      | <b>il7_blood</b>   |                        |                      |
| Mean (SD)             | 12.1 (6.13)            | 12.4 (5.37)          | Mean (SD)          | 16.3 (13.2)            | 17.9 (13.2)          |
| Median [Min, Max]     | 10.6 [4.64, 27.2]      | 11.3 [4.47, 26.9]    | Median [Min, Max]  | 28.5 [0.0359, 28.5]    | 28.5 [0.220, 28.5]   |
| Missing               | 395 (91.6%)            | 343 (92.0%)          | Missing            | 395 (91.6%)            | 343 (92.0%)          |
| <b>rantes_blood</b>   |                        |                      | <b>ip10_blood</b>  |                        |                      |
| Mean (SD)             | 1070 (638)             | 1080 (645)           | Mean (SD)          | 1.93 (3.30)            | 3.61 (9.87)          |
| Median [Min, Max]     | 913 [117, 2760]        | 756 [98.7, 2340]     | Median [Min, Max]  | 0.863 [0.199, 19.5]    | 1.15 [0.0809, 54.7]  |
| Missing               | 395 (91.6%)            | 343 (92.0%)          | Missing            | 395 (91.6%)            | 343 (92.0%)          |
| <b>ectaxin_blood</b>  |                        |                      | <b>il2r_blood</b>  |                        |                      |
| Mean (SD)             | 4.53 (5.57)            | 4.04 (3.43)          | Mean (SD)          | 18.6 (13.9)            | 30.6 (34.1)          |
| Median [Min, Max]     | 3.37 [0.549, 33.7]     | 3.00 [0.527, 12.7]   | Median [Min, Max]  | 14.3 [0.556, 72.9]     | 21.0 [0, 172]        |
| Missing               | 395 (91.6%)            | 343 (92.0%)          | Missing            | 395 (91.6%)            | 343 (92.0%)          |
| <b>il17_blood</b>     |                        |                      | <b>mig_blood</b>   |                        |                      |
| Mean (SD)             | 1.08 (3.62)            | 1.03 (2.46)          | Mean (SD)          | 6.77 (9.57)            | 11.7 (14.2)          |
| Median [Min, Max]     | 0.378 [0, 21.7]        | 0.378 [0, 13.2]      | Median [Min, Max]  | 2.98 [0, 47.4]         | 8.02 [0.446, 64.6]   |
| Missing               | 395 (91.6%)            | 343 (92.0%)          | Missing            | 395 (91.6%)            | 343 (92.0%)          |
| <b>mip1a_blood</b>    |                        |                      | <b>il4_blood</b>   |                        |                      |
| Mean (SD)             | 27.8 (77.0)            | 15.3 (20.8)          | Mean (SD)          | 9.20 (9.13)            | 10.2 (9.90)          |
| Median [Min, Max]     | 4.19 [1.00, 372]       | 6.37 [0.543, 77.1]   | Median [Min, Max]  | 5.80 [0.340, 32.4]     | 6.54 [0.340, 36.4]   |
| Missing               | 395 (91.6%)            | 343 (92.0%)          | Missing            | 395 (91.6%)            | 343 (92.0%)          |
| <b>gmcsfblood</b>     |                        |                      | <b>il8_blood</b>   |                        |                      |
| Mean (SD)             | 1.52 (3.80)            | 1.69 (3.41)          | Mean (SD)          | 117 (199)              | 334 (808)            |
| Median [Min, Max]     | 0.290 [0.0156, 22.6]   | 0.357 [0, 14.9]      | Median [Min, Max]  | 55.0 [3.43, 922]       | 89.6 [1.18, 4220]    |
| Missing               | 395 (91.6%)            | 343 (92.0%)          | Missing            | 395 (91.6%)            | 343 (92.0%)          |
| <b>mip1b_blood</b>    |                        |                      |                    |                        |                      |
| Mean (SD)             | 34.3 (39.0)            | 35.9 (36.3)          |                    |                        |                      |
| Median [Min, Max]     | 14.1 [2.49, 153]       | 23.0 [5.34, 162]     |                    |                        |                      |
| Missing               | 395 (91.6%)            | 343 (92.0%)          |                    |                        |                      |
| <b>mcp1_blood</b>     |                        |                      |                    |                        |                      |
| Mean (SD)             | 17.1 (16.3)            | 31.5 (40.8)          |                    |                        |                      |
| Median [Min, Max]     | 10.8 [0, 72.6]         | 14.3 [0, 192]        |                    |                        |                      |
| Missing               | 395 (91.6%)            | 343 (92.0%)          |                    |                        |                      |
| <b>il15_blood</b>     |                        |                      |                    |                        |                      |
| Mean (SD)             | 19.2 (18.2)            | 25.9 (32.4)          |                    |                        |                      |
| Median [Min, Max]     | 16.9 [0, 101]          | 19.2 [2.77, 180]     |                    |                        |                      |
| Missing               | 395 (91.6%)            | 343 (92.0%)          |                    |                        |                      |
| <b>egfblood</b>       |                        |                      |                    |                        |                      |
| Mean (SD)             | 19.2 (9.76)            | 18.4 (8.54)          |                    |                        |                      |
| Median [Min, Max]     | 18.4 [3.36, 40.8]      | 18.8 [4.91, 33.6]    |                    |                        |                      |
| Missing               | 395 (91.6%)            | 343 (92.0%)          |                    |                        |                      |
| <b>il5_blood</b>      |                        |                      |                    |                        |                      |
| Mean (SD)             | 0.941 (1.72)           | 0.751 (1.49)         |                    |                        |                      |
| Median [Min, Max]     | 0.208 [0, 5.06]        | 0.176 [0.0135, 5.06] |                    |                        |                      |
| Missing               | 395 (91.6%)            | 343 (92.0%)          |                    |                        |                      |
| <b>hgb_blood</b>      |                        |                      |                    |                        |                      |
| Mean (SD)             | 9.98 (10.1)            | 15.3 (24.4)          |                    |                        |                      |
| Median [Min, Max]     | 6.80 [2.31, 48.1]      | 8.98 [1.10, 137]     |                    |                        |                      |
| Missing               | 395 (91.6%)            | 343 (92.0%)          |                    |                        |                      |

Table S3: Summary of the endocab levels in the blood of children in Madagascar

|                   | <b>non-stunted<br/>(N=431)</b> | <b>stunted<br/>(N=373)</b> |
|-------------------|--------------------------------|----------------------------|
| <b>amu</b>        |                                |                            |
| Mean (SD)         | 16.0 (8.59)                    | 29.5 (56.5)                |
| Median [Min, Max] | 12.8 [6.52, 44.5]              | 13.7 [8.93, 344]           |
| Missing           | 406 (94.2%)                    | 337 (90.3%)                |
| <b>mmu</b>        |                                |                            |
| Mean (SD)         | 27.8 (10.9)                    | 25.1 (8.38)                |
| Median [Min, Max] | 29.7 [8.95, 51.8]              | 26.4 [11.7, 42.4]          |
| Missing           | 406 (94.2%)                    | 337 (90.3%)                |
| <b>gmu200</b>     |                                |                            |
| Mean (SD)         | 52.6 (37.5)                    | 63.8 (70.2)                |
| Median [Min, Max] | 48.0 [18.2, 197]               | 50.7 [17.0, 419]           |
| Missing           | 406 (94.2%)                    | 337 (90.3%)                |
